# Supplementary material for: Crownphyrins: Metal‐Mediated Transformations of the Porphyrin‐Crown Ether Hybrids
Source: PubMed Central journal article supplement (PMC10098552; doi:10.1002/anie.202211671), 2022-11-09

## checkCIF/PLATON report

Structure factors have been supplied for datablock(s) 14aH3, 14aH7, 15aH72HCl, 15bH, 20aPb, 22aZn, 22bCd, 22bHg, 22bZn

THIS REPORT IS FOR GUIDANCE ONLY. IF USED AS PART OF A REVIEW PROCEDURE FOR PUBLICATION, IT SHOULD NOT REPLACE THE EXPERTISE OF AN EXPERIENCED CRYSTALLOGRAPHIC REFEREE.

No syntax errors found.      CIF dictionary      Interpreting this report

### Datablock: 14aH3

---

Bond precision:    C-C = 0.0034 Å                      Wavelength=0.71073

Cell:                      a=12.185 (3)              b=9.096 (2)              c=20.334 (3)  
                                    alpha=90                      beta=102.14 (3)              gamma=90

Temperature:              100 K

|                        | Calculated          | Reported            |
|------------------------|---------------------|---------------------|
| Volume                 | 2203.3 (8)          | 2203.3 (8)          |
| Space group            | P 21/n              | P 21/n              |
| Hall group             | -P 2yn              | -P 2yn              |
| Moiety formula         | C23 H26 N4 O2, H2 O | C23 H26 N4 O2, H2 O |
| Sum formula            | C23 H28 N4 O3       | C23 H28 N4 O3       |
| Mr                     | 408.49              | 408.49              |
| Dx, g cm <sup>-3</sup> | 1.232               | 1.231               |
| Z                      | 4                   | 4                   |
| Mu (mm <sup>-1</sup> ) | 0.083               | 0.083               |
| F000                   | 872.0               | 872.0               |
| F000'                  | 872.36              |                     |
| h, k, lmax             | 20, 15, 34          | 18, 11, 33          |
| Nref                   | 11040               | 6315                |
| Tmin, Tmax             | 0.972, 0.988        | 0.879, 1.000        |
| Tmin'                  | 0.952               |                     |

Correction method= # Reported T Limits: Tmin=0.879 Tmax=1.000  
AbsCorr = MULTI-SCAN

Data completeness= 0.572                      Theta (max)= 36.782

R(reflections)= 0.0762 ( 3272)

wR2(reflections)=  
0.2137 ( 6315)

S = 1.033

Npar= 275

---

The following ALERTS were generated. Each ALERT has the format  
**test-name\_ALERT\_alert-type\_alert-level.**

Click on the hyperlinks for more details of the test.

---

● **Alert level C**

|                   |                                                  |        |       |
|-------------------|--------------------------------------------------|--------|-------|
| PLAT906_ALERT_3_C | Large K Value in the Analysis of Variance .....  | 19.879 | Check |
| PLAT906_ALERT_3_C | Large K Value in the Analysis of Variance .....  | 2.626  | Check |
| PLAT906_ALERT_3_C | Large K Value in the Analysis of Variance .....  | 4.662  | Check |
| PLAT906_ALERT_3_C | Large K Value in the Analysis of Variance .....  | 2.284  | Check |
| PLAT910_ALERT_3_C | Missing # of FCF Reflection(s) Below Theta(Min). | 5      | Note  |

---

● **Alert level G**

|                   |                                                  |      |             |
|-------------------|--------------------------------------------------|------|-------------|
| PLAT007_ALERT_5_G | Number of Unrefined Donor-H Atoms .....          | 4    | Report      |
| PLAT883_ALERT_1_G | No Info/Value for _atom_sites_solution_primary . |      | Please Do ! |
| PLAT899_ALERT_4_G | SHELXL97 is Deprecated and Succeeded by SHELXL/  | 2018 | Note        |
| PLAT912_ALERT_4_G | Missing # of FCF Reflections Above STh/L= 0.600  | 3613 | Note        |
| PLAT941_ALERT_3_G | Average HKL Measurement Multiplicity .....       | 3.5  | Low         |
| PLAT950_ALERT_5_G | Calculated (ThMax) and CIF-Reported Hmax Differ  | 2    | Units       |
| PLAT951_ALERT_5_G | Calculated (ThMax) and CIF-Reported Kmax Differ  | 4    | Units       |
| PLAT956_ALERT_1_G | Calculated (ThMax) and Actual (FCF) Hmax Differ  | 2    | Units       |
| PLAT957_ALERT_1_G | Calculated (ThMax) and Actual (FCF) Kmax Differ  | 4    | Units       |
| PLAT978_ALERT_2_G | Number C-C Bonds with Positive Residual Density. | 2    | Info        |
| PLAT992_ALERT_5_G | Repd & Actual _reflns_number_gt Values Differ by | 2    | Check       |

---

0 **ALERT level A** = Most likely a serious problem - resolve or explain  
0 **ALERT level B** = A potentially serious problem, consider carefully  
5 **ALERT level C** = Check. Ensure it is not caused by an omission or oversight  
11 **ALERT level G** = General information/check it is not something unexpected

3 ALERT type 1 CIF construction/syntax error, inconsistent or missing data  
1 ALERT type 2 Indicator that the structure model may be wrong or deficient  
6 ALERT type 3 Indicator that the structure quality may be low  
2 ALERT type 4 Improvement, methodology, query or suggestion  
4 ALERT type 5 Informative message, check

---

## Datablock: 14aH7

---

Bond precision: C-C = 0.0000 A

Wavelength=1.54184

Cell: a=8.520(2) b=17.383(3) c=15.051(3)

alpha=90 beta=90 gamma=90

Temperature: 100 K



|                   |                                                  |       |              |
|-------------------|--------------------------------------------------|-------|--------------|
| PLAT007_ALERT_5_G | Number of Unrefined Donor-H Atoms .....          | 6     | Report       |
| PLAT012_ALERT_1_G | N.O.K. _shelx_res_checksum Found in CIF .....    |       | Please Check |
| PLAT013_ALERT_1_G | N.O.K. _shelx_hkl_checksum Found in CIF .....    |       | Please Check |
| PLAT169_ALERT_4_G | The CIF-Embedded .res File Contains AFIX 1 Recds | 2     | Report       |
| PLAT171_ALERT_4_G | The CIF-Embedded .res File Contains EADP Records | 2     | Report       |
| PLAT186_ALERT_4_G | The CIF-Embedded .res File Contains ISOR Records | 1     | Report       |
| PLAT300_ALERT_4_G | Atom Site Occupancy of H1W Constrained at        | 0.886 | Check        |
| PLAT300_ALERT_4_G | Atom Site Occupancy of H11W Constrained at       | 0.114 | Check        |
| PLAT301_ALERT_3_G | Main Residue Disorder .....(Resd 1 )             | 100%  | Note         |
| PLAT301_ALERT_3_G | Main Residue Disorder .....(Resd 2 )             | 100%  | Note         |
| PLAT302_ALERT_4_G | Anion/Solvent/Minor-Residue Disorder (Resd 3 )   | 100%  | Note         |
| PLAT302_ALERT_4_G | Anion/Solvent/Minor-Residue Disorder (Resd 4 )   | 100%  | Note         |
| PLAT304_ALERT_4_G | Non-Integer Number of Atoms in ..... (Resd 1 )   | 52.27 | Check        |
| PLAT304_ALERT_4_G | Non-Integer Number of Atoms in ..... (Resd 2 )   | 6.73  | Check        |
| PLAT304_ALERT_4_G | Non-Integer Number of Atoms in ..... (Resd 3 )   | 2.66  | Check        |
| PLAT304_ALERT_4_G | Non-Integer Number of Atoms in ..... (Resd 4 )   | 0.34  | Check        |
| PLAT398_ALERT_2_G | Deviating C-O-C Angle From 120 for O9 .          | 93.7  | Degree       |
| PLAT720_ALERT_4_G | Number of Unusual/Non-Standard Labels .....      | 9     | Note         |
| PLAT773_ALERT_2_G | Check long C-C Bond in CIF: C1A --C2A            | 1.82  | Ang.         |
| PLAT779_ALERT_4_G | Suspect or Irrelevant (Bond) Angle(s) in CIF ... | 37.80 | Deg.         |
|                   | C10 -O9 -C100 1_555 1_555 7_565 ..... #          | 15    | Check        |
| PLAT779_ALERT_4_G | Suspect or Irrelevant (Bond) Angle(s) in CIF ... | 37.40 | Deg.         |
|                   | C100 -C10 -C100 7_565 1_555 1_555 ..... #        | 19    | Check        |
| PLAT779_ALERT_4_G | Suspect or Irrelevant (Bond) Angle(s) in CIF ... | 40.00 | Deg.         |
|                   | C10 -C10 -C100 7_565 1_555 1_555 ..... #         | 20    | Check        |
| PLAT779_ALERT_4_G | Suspect or Irrelevant (Bond) Angle(s) in CIF ... | 40.00 | Deg.         |
|                   | C100 -C100 -C10 7_565 1_555 1_555 ..... #        | 23    | Check        |
| PLAT860_ALERT_3_G | Number of Least-Squares Restraints .....         | 102   | Note         |
| PLAT883_ALERT_1_G | No Info/Value for _atom_sites_solution_primary . |       | Please Do !  |
| PLAT912_ALERT_4_G | Missing # of FCF Reflections Above STh/L= 0.600  | 5     | Note         |
| PLAT965_ALERT_2_G | The SHELXL WEIGHT Optimisation has not Converged |       | Please Check |
| PLAT978_ALERT_2_G | Number C-C Bonds with Positive Residual Density. | 3     | Info         |

---

0 **ALERT level A** = Most likely a serious problem - resolve or explain  
1 **ALERT level B** = A potentially serious problem, consider carefully  
7 **ALERT level C** = Check. Ensure it is not caused by an omission or oversight  
29 **ALERT level G** = General information/check it is not something unexpected

4 ALERT type 1 CIF construction/syntax error, inconsistent or missing data  
6 ALERT type 2 Indicator that the structure model may be wrong or deficient  
9 ALERT type 3 Indicator that the structure quality may be low  
17 ALERT type 4 Improvement, methodology, query or suggestion  
1 ALERT type 5 Informative message, check

---

## Datablock: 15aH72HCl

---

Bond precision: C-C = 0.0057 A

Wavelength=1.54184

Cell: a=13.411(5) b=10.170(3) c=20.383(6)

alpha=90 beta=97.98(3) gamma=90

Temperature: 100 K

|                        | Calculated           | Reported           |
|------------------------|----------------------|--------------------|
| Volume                 | 2753.1(16)           | 2753.1(16)         |
| Space group            | P 21/c               | P 21/c             |
| Hall group             | -P 2ybc              | -P 2ybc            |
| Moiety formula         | C27 H40 N4 O3, 2(C1) | C27 H40 N4 O3, 2C1 |
| Sum formula            | C27 H40 Cl2 N4 O3    | C27 H40 Cl2 N4 O3  |
| Mr                     | 539.53               | 539.53             |
| Dx, g cm <sup>-3</sup> | 1.302                | 1.302              |
| Z                      | 4                    | 4                  |
| Mu (mm <sup>-1</sup> ) | 2.403                | 2.403              |
| F000                   | 1152.0               | 1152.0             |
| F000'                  | 1157.79              |                    |
| h, k, lmax             | 16, 12, 24           | 16, 12, 24         |
| Nref                   | 4900                 | 4896               |
| Tmin, Tmax             | 0.771, 0.845         | 0.755, 0.841       |
| Tmin'                  | 0.714                |                    |

Correction method= # Reported T Limits: Tmin=0.755 Tmax=0.841  
AbsCorr = ANALYTICAL

Data completeness= 0.999                      Theta(max)= 66.994

R(reflections)= 0.0751( 3240)                      wR2(reflections)=  
0.2295( 4896)  
S = 1.087                      Npar= 489

The following ALERTS were generated. Each ALERT has the format

**test-name\_ALERT\_alert-type\_alert-level.**

Click on the hyperlinks for more details of the test.

### ● Alert level C

|                   |                                                  |              |
|-------------------|--------------------------------------------------|--------------|
| PLAT042_ALERT_1_C | Calc. and Reported MoietyFormula Strings Differ  | Please Check |
| PLAT094_ALERT_2_C | Ratio of Maximum / Minimum Residual Density .... | 2.29 Report  |
| PLAT220_ALERT_2_C | NonSolvent Resd 1 C Ueq(max)/Ueq(min) Range      | 5.6 Ratio    |
| PLAT222_ALERT_3_C | NonSolvent Resd 1 H Uiso(max)/Uiso(min) Range    | 5.6 Ratio    |
| PLAT230_ALERT_2_C | Hirshfeld Test Diff for N27 --C4 .               | 5.3 s.u.     |
| PLAT234_ALERT_4_C | Large Hirshfeld Difference N25 --C26 .           | 0.18 Ang.    |
| PLAT234_ALERT_4_C | Large Hirshfeld Difference C19 --C20 .           | 0.20 Ang.    |
| PLAT340_ALERT_3_C | Low Bond Precision on C-C Bonds .....            | 0.00569 Ang. |
| PLAT906_ALERT_3_C | Large K Value in the Analysis of Variance .....  | 6.788 Check  |
| PLAT906_ALERT_3_C | Large K Value in the Analysis of Variance .....  | 2.009 Check  |
| PLAT911_ALERT_3_C | Missing FCF Refl Between Thmin & STh/L= 0.597    | 6 Report     |

### ● Alert level G

|                   |                                                  |           |
|-------------------|--------------------------------------------------|-----------|
| PLAT002_ALERT_2_G | Number of Distance or Angle Restraints on AtSite | 38 Note   |
| PLAT003_ALERT_2_G | Number of Uiso or Uij Restrained non-H Atoms ... | 36 Report |
| PLAT007_ALERT_5_G | Number of Unrefined Donor-H Atoms .....          | 10 Report |





PLAT912\_ALERT\_4\_G Missing # of FCF Reflections Above STh/L= 0.600 63 Note  
 PLAT915\_ALERT\_3\_G No Flack x Check Done: Low Friedel Pair Coverage 59 %  
 PLAT941\_ALERT\_3\_G Average HKL Measurement Multiplicity ..... 3.9 Low  
 PLAT978\_ALERT\_2\_G Number C-C Bonds with Positive Residual Density. 1 Info

- 
- 0 **ALERT level A** = Most likely a serious problem - resolve or explain  
 0 **ALERT level B** = A potentially serious problem, consider carefully  
 2 **ALERT level C** = Check. Ensure it is not caused by an omission or oversight  
 13 **ALERT level G** = General information/check it is not something unexpected
- 1 ALERT type 1 CIF construction/syntax error, inconsistent or missing data  
 4 ALERT type 2 Indicator that the structure model may be wrong or deficient  
 6 ALERT type 3 Indicator that the structure quality may be low  
 3 ALERT type 4 Improvement, methodology, query or suggestion  
 1 ALERT type 5 Informative message, check
- 

## Datablock: 20aPb

---

Bond precision: C-C = 0.0134 A Wavelength=1.54184

Cell: a=19.442(2) b=13.794(2) c=19.055(2)  
 alpha=90 beta=113.33(3) gamma=90

Temperature: 100 K

|                        | Calculated       | Reported         |
|------------------------|------------------|------------------|
| Volume                 | 4692.4(14)       | 4692.4(14)       |
| Space group            | P 21/c           | P 21/c           |
| Hall group             | -P 2ybc          | -P 2ybc          |
| Moiety formula         | C25 H26 N4 O4 Pb | C25 H26 N4 O4 Pb |
| Sum formula            | C25 H26 N4 O4 Pb | C25 H26 N4 O4 Pb |
| Mr                     | 653.70           | 653.69           |
| Dx, g cm <sup>-3</sup> | 1.851            | 1.851            |
| Z                      | 8                | 8                |
| Mu (mm <sup>-1</sup> ) | 14.316           | 14.316           |
| F000                   | 2544.0           | 2544.0           |
| F000'                  | 2517.83          |                  |
| h, k, lmax             | 24, 17, 23       | 24, 17, 23       |
| Nref                   | 9447             | 17047            |
| Tmin, Tmax             | 0.291, 0.651     | 0.275, 1.000     |
| Tmin'                  | 0.066            |                  |

Correction method= # Reported T Limits: Tmin=0.275 Tmax=1.000  
 AbsCorr = MULTI-SCAN



Data completeness= 1.804

Theta(max)= 73.420

R(reflections)= 0.0509( 14374)

wR2(reflections)=  
0.1457( 17047)

S = 1.073

Npar= 614

---

The following ALERTS were generated. Each ALERT has the format

**test-name\_ALERT\_alert-type\_alert-level.**

Click on the hyperlinks for more details of the test.

---

● **Alert level C**

|                                                                    |              |
|--------------------------------------------------------------------|--------------|
| PLAT241_ALERT_2_C High 'MainMol' Ueq as Compared to Neighbors of   | 02 Check     |
| PLAT342_ALERT_3_C Low Bond Precision on C-C Bonds .....            | 0.01338 Ang. |
| PLAT790_ALERT_4_C Centre of Gravity not Within Unit Cell: Resd. #  | 1 Note       |
| C25 H26 N4 O4 Pb                                                   |              |
| PLAT906_ALERT_3_C Large K Value in the Analysis of Variance .....  | 5.184 Check  |
| PLAT911_ALERT_3_C Missing FCF Refl Between Thmin & STh/L= 0.600    | 21 Report    |
| PLAT918_ALERT_3_C Reflection(s) with I(obs) much Smaller I(calc) . | 17 Check     |
| PLAT939_ALERT_3_C Large Value of Not (SHELXL) Weight Optimized S . | 24.31 Check  |

---

● **Alert level G**

|                                                                    |              |
|--------------------------------------------------------------------|--------------|
| PLAT083_ALERT_2_G SHELXL Second Parameter in WGHT Unusually Large  | 41.28 Why ?  |
| PLAT380_ALERT_4_G Incorrectly? Oriented X(sp2)-Methyl Moiety ..... | C31A Check   |
| PLAT720_ALERT_4_G Number of Unusual/Non-Standard Labels .....      | 4 Note       |
| PLAT790_ALERT_4_G Centre of Gravity not Within Unit Cell: Resd. #  | 2 Note       |
| C25 H26 N4 O4 Pb                                                   |              |
| PLAT794_ALERT_5_G Tentative Bond Valency for Pb1 (II) .            | 2.22 Info    |
| PLAT794_ALERT_5_G Tentative Bond Valency for Pb2 (II) .            | 2.12 Info    |
| PLAT870_ALERT_4_G ALERTS Related to Twinning Effects Suppressed .. | ! Info       |
| PLAT883_ALERT_1_G No Info/Value for _atom_sites_solution_primary . | Please Do !  |
| PLAT912_ALERT_4_G Missing # of FCF Reflections Above STh/L= 0.600  | 294 Note     |
| PLAT941_ALERT_3_G Average HKL Measurement Multiplicity .....       | 1.9 Low      |
| PLAT965_ALERT_2_G The SHELXL WEIGHT Optimisation has not Converged | Please Check |

---

0 **ALERT level A** = Most likely a serious problem - resolve or explain  
0 **ALERT level B** = A potentially serious problem, consider carefully  
7 **ALERT level C** = Check. Ensure it is not caused by an omission or oversight  
11 **ALERT level G** = General information/check it is not something unexpected

1 ALERT type 1 CIF construction/syntax error, inconsistent or missing data  
3 ALERT type 2 Indicator that the structure model may be wrong or deficient  
6 ALERT type 3 Indicator that the structure quality may be low  
6 ALERT type 4 Improvement, methodology, query or suggestion  
2 ALERT type 5 Informative message, check

---

## Datablock: 22aZn

---

Bond precision: C-C = 0.0021 A

Wavelength=1.54184

Cell: a=8.507(2) b=17.186(3) c=17.472(3)  
 alpha=100.29(2) beta=96.09(2) gamma=102.48(3)  
 Temperature: 100 K

|                        | Calculated       | Reported         |
|------------------------|------------------|------------------|
| Volume                 | 2426.0(9)        | 2426.0(9)        |
| Space group            | P -1             | P -1             |
| Hall group             | -P 1             | -P 1             |
| Moiety formula         | C54 H62 N8 O6 Zn | C54 H62 N8 O6 Zn |
| Sum formula            | C54 H62 N8 O6 Zn | C54 H62 N8 O6 Zn |
| Mr                     | 984.51           | 984.48           |
| Dx, g cm <sup>-3</sup> | 1.348            | 1.348            |
| Z                      | 2                | 2                |
| Mu (mm <sup>-1</sup> ) | 1.187            | 1.187            |
| F000                   | 1040.0           | 1040.0           |
| F000'                  | 1039.73          |                  |
| h, k, lmax             | 10, 21, 21       | 10, 21, 21       |
| Nref                   | 10117            | 9909             |
| Tmin, Tmax             | 0.843, 0.965     | 0.888, 1.000     |
| Tmin'                  | 0.770            |                  |

Correction method= # Reported T Limits: Tmin=0.888 Tmax=1.000  
 AbsCorr = MULTI-SCAN

Data completeness= 0.979 Theta(max)= 75.835

R(reflections)= 0.0338( 8945) wR2(reflections)=  
 0.0912( 9909)  
 S = 1.081 Npar= 650

The following ALERTS were generated. Each ALERT has the format  
**test-name\_ALERT\_alert-type\_alert-level.**  
 Click on the hyperlinks for more details of the test.

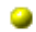

#### Alert level C

|                                                                 |           |
|-----------------------------------------------------------------|-----------|
| PLAT220_ALERT_2_C NonSolvent Resd 1 C Ueq(max)/Ueq(min) Range   | 3.2 Ratio |
| PLAT911_ALERT_3_C Missing FCF Refl Between Thmin & STh/L= 0.600 | 7 Report  |

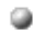

#### Alert level G

|                                                                    |              |
|--------------------------------------------------------------------|--------------|
| PLAT003_ALERT_2_G Number of Uiso or Uij Restrained non-H Atoms ... | 4 Report     |
| PLAT178_ALERT_4_G The CIF-Embedded .res File Contains SIMU Records | 1 Report     |
| PLAT230_ALERT_2_G Hirshfeld Test Diff for O21 --C22 .              | 6.9 s.u.     |
| PLAT301_ALERT_3_G Main Residue Disorder .....(Resd 1 )             | 4% Note      |
| PLAT398_ALERT_2_G Deviating C-O-C Angle From 120 for O21A .        | 108.1 Degree |
| PLAT410_ALERT_2_G Short Intra H...H Contact H16B ..H19D .          | 1.86 Ang.    |



|                        | Calculated                       | Reported                         |
|------------------------|----------------------------------|----------------------------------|
| Volume                 | 5841.4(19)                       | 5841.3(19)                       |
| Space group            | P 21/c                           | P 21/c                           |
| Hall group             | -P 2ybc                          | -P 2ybc                          |
| Moiety formula         | C54 H52 F10 N8 O6 Zn [+ solvent] | C54 H52 F10 N8 O6 Zn [+ solvent] |
| Sum formula            | C54 H52 F10 N8 O6 Zn [+ solvent] | C54 H52 F10 N8 O6 Zn [+ solvent] |
| Mr                     | 1164.43                          | 1164.40                          |
| Dx, g cm <sup>-3</sup> | 1.324                            | 1.324                            |
| Z                      | 4                                | 4                                |
| Mu (mm <sup>-1</sup> ) | 1.326                            | 1.326                            |
| F000                   | 2400.0                           | 2400.0                           |
| F000'                  | 2402.35                          |                                  |
| h, k, lmax             | 16, 19, 35                       | 16, 19, 35                       |
| Nref                   | 12199                            | 12000                            |
| Tmin, Tmax             | 0.867, 0.961                     | 0.576, 1.000                     |
| Tmin'                  | 0.864                            |                                  |

Correction method= # Reported T Limits: Tmin=0.576 Tmax=1.000  
AbsCorr = MULTI-SCAN

Data completeness= 0.984                      Theta(max)= 76.077

R(reflections)= 0.0617( 7895)                      wR2(reflections)=  
0.1912( 12000)  
S = 1.058                      Npar= 713

The following ALERTS were generated. Each ALERT has the format  
**test-name\_ALERT\_alert-type\_alert-level.**  
Click on the hyperlinks for more details of the test.

#### Alert level C

PLAT230\_ALERT\_2\_C Hirshfeld Test Diff for C19 --C20 . 5.2 s.u.  
PLAT790\_ALERT\_4\_C Centre of Gravity not Within Unit Cell: Resd. # 1 Note  
C54 H52 F10 N8 O6 Zn  
PLAT911\_ALERT\_3\_C Missing FCF Refl Between Thmin & STh/L= 0.600 5 Report  
PLAT934\_ALERT\_3\_C Number of (Iobs-Icalc)/Sigma(W) > 10 Outliers .. 1 Check

#### Alert level G

CELLZ01\_ALERT\_1\_G Difference between formula and atom\_site contents detected.  
CELLZ01\_ALERT\_1\_G ALERT: Large difference may be due to a  
symmetry error - see SYMMG tests  
From the CIF: \_cell\_formula\_units\_Z 4  
From the CIF: \_chemical\_formula\_sum C54 H52 F10 N8 O6 Zn [+ solvent]  
TEST: Compare cell contents of formula and atom\_site data











|                   |                                                  |                |       |        |
|-------------------|--------------------------------------------------|----------------|-------|--------|
| PLAT300_ALERT_4_G | Atom Site Occupancy of H22C                      | Constrained at | 0.5   | Check  |
| PLAT300_ALERT_4_G | Atom Site Occupancy of H22D                      | Constrained at | 0.5   | Check  |
| PLAT300_ALERT_4_G | Atom Site Occupancy of H23A                      | Constrained at | 0.5   | Check  |
| PLAT300_ALERT_4_G | Atom Site Occupancy of H23B                      | Constrained at | 0.5   | Check  |
| PLAT300_ALERT_4_G | Atom Site Occupancy of H23C                      | Constrained at | 0.5   | Check  |
| PLAT300_ALERT_4_G | Atom Site Occupancy of H23D                      | Constrained at | 0.5   | Check  |
| PLAT300_ALERT_4_G | Atom Site Occupancy of H24A                      | Constrained at | 0.5   | Check  |
| PLAT300_ALERT_4_G | Atom Site Occupancy of H24B                      | Constrained at | 0.5   | Check  |
| PLAT300_ALERT_4_G | Atom Site Occupancy of H24C                      | Constrained at | 0.5   | Check  |
| PLAT300_ALERT_4_G | Atom Site Occupancy of H24D                      | Constrained at | 0.5   | Check  |
| PLAT300_ALERT_4_G | Atom Site Occupancy of H26A                      | Constrained at | 0.5   | Check  |
| PLAT300_ALERT_4_G | Atom Site Occupancy of H26B                      | Constrained at | 0.5   | Check  |
| PLAT300_ALERT_4_G | Atom Site Occupancy of H40A                      | Constrained at | 0.5   | Check  |
| PLAT300_ALERT_4_G | Atom Site Occupancy of H40B                      | Constrained at | 0.5   | Check  |
| PLAT300_ALERT_4_G | Atom Site Occupancy of H40C                      | Constrained at | 0.5   | Check  |
| PLAT300_ALERT_4_G | Atom Site Occupancy of H40D                      | Constrained at | 0.5   | Check  |
| PLAT300_ALERT_4_G | Atom Site Occupancy of H42A                      | Constrained at | 0.5   | Check  |
| PLAT300_ALERT_4_G | Atom Site Occupancy of H42B                      | Constrained at | 0.5   | Check  |
| PLAT300_ALERT_4_G | Atom Site Occupancy of H42C                      | Constrained at | 0.5   | Check  |
| PLAT300_ALERT_4_G | Atom Site Occupancy of H42D                      | Constrained at | 0.5   | Check  |
| PLAT300_ALERT_4_G | Atom Site Occupancy of H43A                      | Constrained at | 0.5   | Check  |
| PLAT300_ALERT_4_G | Atom Site Occupancy of H43B                      | Constrained at | 0.5   | Check  |
| PLAT300_ALERT_4_G | Atom Site Occupancy of H43C                      | Constrained at | 0.5   | Check  |
| PLAT300_ALERT_4_G | Atom Site Occupancy of H43D                      | Constrained at | 0.5   | Check  |
| PLAT300_ALERT_4_G | Atom Site Occupancy of H45A                      | Constrained at | 0.5   | Check  |
| PLAT300_ALERT_4_G | Atom Site Occupancy of H45B                      | Constrained at | 0.5   | Check  |
| PLAT300_ALERT_4_G | Atom Site Occupancy of H45C                      | Constrained at | 0.5   | Check  |
| PLAT300_ALERT_4_G | Atom Site Occupancy of H45D                      | Constrained at | 0.5   | Check  |
| PLAT300_ALERT_4_G | Atom Site Occupancy of H46A                      | Constrained at | 0.5   | Check  |
| PLAT300_ALERT_4_G | Atom Site Occupancy of H46B                      | Constrained at | 0.5   | Check  |
| PLAT300_ALERT_4_G | Atom Site Occupancy of H46C                      | Constrained at | 0.5   | Check  |
| PLAT300_ALERT_4_G | Atom Site Occupancy of H46D                      | Constrained at | 0.5   | Check  |
| PLAT300_ALERT_4_G | Atom Site Occupancy of H48A                      | Constrained at | 0.5   | Check  |
| PLAT300_ALERT_4_G | Atom Site Occupancy of H48B                      | Constrained at | 0.5   | Check  |
| PLAT300_ALERT_4_G | Atom Site Occupancy of H48C                      | Constrained at | 0.5   | Check  |
| PLAT300_ALERT_4_G | Atom Site Occupancy of H48D                      | Constrained at | 0.5   | Check  |
| PLAT300_ALERT_4_G | Atom Site Occupancy of O70                       | Constrained at | 0.5   | Check  |
| PLAT300_ALERT_4_G | Atom Site Occupancy of O70A                      | Constrained at | 0.5   | Check  |
| PLAT301_ALERT_3_G | Main Residue Disorder .....(Resd 1 )             |                | 33%   | Note   |
| PLAT302_ALERT_4_G | Anion/Solvent/Minor-Residue Disorder (Resd 2 )   |                | 100%  | Note   |
| PLAT302_ALERT_4_G | Anion/Solvent/Minor-Residue Disorder (Resd 3 )   |                | 100%  | Note   |
| PLAT304_ALERT_4_G | Non-Integer Number of Atoms in ..... (Resd 2 )   |                | 0.50  | Check  |
| PLAT304_ALERT_4_G | Non-Integer Number of Atoms in ..... (Resd 3 )   |                | 0.50  | Check  |
| PLAT311_ALERT_2_G | Isolated Disordered Oxygen Atom (No H's ?) ..... |                | O70   | Check  |
| PLAT311_ALERT_2_G | Isolated Disordered Oxygen Atom (No H's ?) ..... |                | O70A  | Check  |
| PLAT367_ALERT_2_G | Long? C(sp?)-C(sp?) Bond C38 - C39 .             |                | 1.58  | Ang.   |
| PLAT398_ALERT_2_G | Deviating C-O-C Angle From 120 for O18A .        |                | 136.4 | Degree |
| PLAT410_ALERT_2_G | Short Intra H...H Contact H48A ..H49B .          |                | 2.13  | Ang.   |
|                   |                                                  | x,y,z =        | 1_555 | Check  |
| PLAT410_ALERT_2_G | Short Intra H...H Contact H48B ..H49B .          |                | 2.07  | Ang.   |
|                   |                                                  | x,y,z =        | 1_555 | Check  |
| PLAT410_ALERT_2_G | Short Intra H...H Contact H48C ..H49A .          |                | 2.05  | Ang.   |
|                   |                                                  | x,y,z =        | 1_555 | Check  |
| PLAT410_ALERT_2_G | Short Intra H...H Contact H48C ..H49B .          |                | 2.05  | Ang.   |
|                   |                                                  | x,y,z =        | 1_555 | Check  |
| PLAT410_ALERT_2_G | Short Intra H...H Contact H48D ..H49B .          |                | 2.07  | Ang.   |
|                   |                                                  | x,y,z =        | 1_555 | Check  |

|                   |                                                  |      |                    |   |              |
|-------------------|--------------------------------------------------|------|--------------------|---|--------------|
| PLAT411_ALERT_2_G | Short Inter H...H Contact                        | H8A  | ..H24B             | . | 1.75 Ang.    |
|                   |                                                  |      | x,-1+y,z =         |   | 1_545 Check  |
| PLAT411_ALERT_2_G | Short Inter H...H Contact                        | H8A  | ..H24D             | . | 2.11 Ang.    |
|                   |                                                  |      | x,-1+y,z =         |   | 1_545 Check  |
| PLAT431_ALERT_2_G | Short Inter HL..A Contact                        | F60  | ..O18A             | . | 2.58 Ang.    |
|                   |                                                  |      | 2-x,-1/2+y,3/2-z = |   | 2_746 Check  |
| PLAT432_ALERT_2_G | Short Inter X...Y Contact                        | O18A | ..C60              | . | 2.68 Ang.    |
|                   |                                                  |      | 2-x,1/2+y,3/2-z =  |   | 2_756 Check  |
| PLAT432_ALERT_2_G | Short Inter X...Y Contact                        | F61  | ..C60              | . | 2.79 Ang.    |
|                   |                                                  |      | 2-x,1-y,1-z =      |   | 3_766 Check  |
| PLAT432_ALERT_2_G | Short Inter X...Y Contact                        | C19A | ..C60              | . | 3.20 Ang.    |
|                   |                                                  |      | 2-x,1/2+y,3/2-z =  |   | 2_756 Check  |
| PLAT432_ALERT_2_G | Short Inter X...Y Contact                        | C60  | ..C61              | . | 3.16 Ang.    |
|                   |                                                  |      | 2-x,1-y,1-z =      |   | 3_766 Check  |
| PLAT811_ALERT_5_G | No ADDSYM Analysis: Too Many Excluded Atoms .... |      |                    |   | ! Info       |
| PLAT860_ALERT_3_G | Number of Least-Squares Restraints .....         |      |                    |   | 1032 Note    |
| PLAT883_ALERT_1_G | No Info/Value for _atom_sites_solution_primary . |      |                    |   | Please Do !  |
| PLAT912_ALERT_4_G | Missing # of FCF Reflections Above STh/L= 0.600  |      |                    |   | 297 Note     |
| PLAT941_ALERT_3_G | Average HKL Measurement Multiplicity .....       |      |                    |   | 3.8 Low      |
| PLAT965_ALERT_2_G | The SHELXL WEIGHT Optimisation has not Converged |      |                    |   | Please Check |
| PLAT978_ALERT_2_G | Number C-C Bonds with Positive Residual Density. |      |                    |   | 4 Info       |

---

0 **ALERT level A** = Most likely a serious problem - resolve or explain  
 1 **ALERT level B** = A potentially serious problem, consider carefully  
 30 **ALERT level C** = Check. Ensure it is not caused by an omission or oversight  
 145 **ALERT level G** = General information/check it is not something unexpected

7 ALERT type 1 CIF construction/syntax error, inconsistent or missing data  
 41 ALERT type 2 Indicator that the structure model may be wrong or deficient  
 10 ALERT type 3 Indicator that the structure quality may be low  
 117 ALERT type 4 Improvement, methodology, query or suggestion  
 1 ALERT type 5 Informative message, check

---

## Datablock: 22bCd

---

Bond precision: C-C = 0.0176 A                      Wavelength=1.54184

Cell:                      a=23.482(3)              b=8.277(2)              c=28.339(3)  
                             alpha=90                      beta=106.77(2)              gamma=90

Temperature:              100 K



|                   |                                                  |     |              |
|-------------------|--------------------------------------------------|-----|--------------|
| PLAT241_ALERT_2_C | High 'MainMol' Ueq as Compared to Neighbors of   | C34 | Check        |
| PLAT242_ALERT_2_C | Low 'MainMol' Ueq as Compared to Neighbors of    | C66 | Check        |
| PLAT260_ALERT_2_C | Large Average Ueq of Residue Including           | Cd1 | 0.124 Check  |
| PLAT334_ALERT_2_C | Small <C-C> Benzene Dist. C63 -C68 .             |     | 1.37 Ang.    |
| PLAT342_ALERT_3_C | Low Bond Precision on C-C Bonds .....            |     | 0.01763 Ang. |
| PLAT906_ALERT_3_C | Large K Value in the Analysis of Variance .....  |     | 2.938 Check  |
| PLAT911_ALERT_3_C | Missing FCF Refl Between Thmin & STh/L= 0.600    |     | 53 Report    |
| PLAT934_ALERT_3_C | Number of (Iobs-Icalc)/Sigma(W) > 10 Outliers .. |     | 1 Check      |
| PLAT977_ALERT_2_C | Check Negative Difference Density on H42B .      |     | -0.34 eA-3   |

---

**Alert level G**

|                   |                                                   |                      |       |             |
|-------------------|---------------------------------------------------|----------------------|-------|-------------|
| PLAT002_ALERT_2_G | Number of Distance or Angle Restraints on AtSite  |                      | 70    | Note        |
| PLAT003_ALERT_2_G | Number of Uiso or Uij Restrained non-H Atoms ...  |                      | 78    | Report      |
| PLAT174_ALERT_4_G | The CIF-Embedded .res File Contains FLAT Records  |                      | 1     | Report      |
| PLAT176_ALERT_4_G | The CIF-Embedded .res File Contains SADI Records  |                      | 19    | Report      |
| PLAT178_ALERT_4_G | The CIF-Embedded .res File Contains SIMU Records  |                      | 5     | Report      |
| PLAT186_ALERT_4_G | The CIF-Embedded .res File Contains ISOR Records  |                      | 1     | Report      |
| PLAT230_ALERT_2_G | Hirshfeld Test Diff for N51 --C50 .               |                      | 7.5   | s.u.        |
| PLAT230_ALERT_2_G | Hirshfeld Test Diff for C5 --C6 .                 |                      | 7.0   | s.u.        |
| PLAT230_ALERT_2_G | Hirshfeld Test Diff for C5 --C57 .                |                      | 6.0   | s.u.        |
| PLAT232_ALERT_2_G | Hirshfeld Test Diff (M-X) Cd1 --N53A .            |                      | 5.0   | s.u.        |
| PLAT301_ALERT_3_G | Main Residue Disorder ..... (Resd 1 )             |                      | 49%   | Note        |
| PLAT410_ALERT_2_G | Short Intra H...H Contact H14A ..H16C .           |                      | 1.99  | Ang.        |
|                   |                                                   | x, y, z =            | 1_555 | Check       |
| PLAT410_ALERT_2_G | Short Intra H...H Contact H23A ..H22D .           |                      | 1.98  | Ang.        |
|                   |                                                   | x, y, z =            | 1_555 | Check       |
| PLAT410_ALERT_2_G | Short Intra H...H Contact H36A ..H38B .           |                      | 2.02  | Ang.        |
|                   |                                                   | x, y, z =            | 1_555 | Check       |
| PLAT411_ALERT_2_G | Short Inter H...H Contact H34A ..H50D .           |                      | 1.79  | Ang.        |
|                   |                                                   | x, -1+y, z =         | 1_545 | Check       |
| PLAT432_ALERT_2_G | Short Inter X...Y Contact F66 ..C43A .            |                      | 2.96  | Ang.        |
|                   |                                                   | 2-x, -1/2+y, 1/2-z = | 2_745 | Check       |
| PLAT432_ALERT_2_G | Short Inter X...Y Contact F68 ..C46 .             |                      | 2.93  | Ang.        |
|                   |                                                   | 2-x, 1/2+y, 1/2-z =  | 2_755 | Check       |
| PLAT432_ALERT_2_G | Short Inter X...Y Contact O15 ..C42A .            |                      | 2.96  | Ang.        |
|                   |                                                   | x, 1/2-y, -1/2+z =   | 4_565 | Check       |
| PLAT432_ALERT_2_G | Short Inter X...Y Contact O44A ..C66 .            |                      | 2.99  | Ang.        |
|                   |                                                   | 2-x, 1/2+y, 1/2-z =  | 2_755 | Check       |
| PLAT773_ALERT_2_G | Check long C-C Bond in CIF: C50 --C52             |                      | 1.98  | Ang.        |
| PLAT773_ALERT_2_G | Check long C-C Bond in CIF: C4A --C5A             |                      | 2.03  | Ang.        |
| PLAT779_ALERT_4_G | Suspect or Irrelevant (Bond) Angle(s) in CIF ...  |                      | 33.60 | Deg.        |
|                   | N51 -C50 -C52 1_555 1_555 1_555 .....             | #                    | 98    | Check       |
| PLAT779_ALERT_4_G | Suspect or Irrelevant (Bond) Angle(s) in CIF ...  |                      | 42.80 | Deg.        |
|                   | N51 -C52 -C50 1_555 1_555 1_555 .....             | #                    | 128   | Check       |
| PLAT811_ALERT_5_G | No ADDSYM Analysis: Too Many Excluded Atoms ....  |                      |       | ! Info      |
| PLAT860_ALERT_3_G | Number of Least-Squares Restraints .....          |                      | 1743  | Note        |
| PLAT883_ALERT_1_G | No Info/Value for _atom_sites_solution_primary .  |                      |       | Please Do ! |
| PLAT910_ALERT_3_G | Missing # of FCF Reflection(s) Below Theta (Min). |                      | 1     | Note        |
| PLAT912_ALERT_4_G | Missing # of FCF Reflections Above STh/L= 0.600   |                      | 426   | Note        |
| PLAT941_ALERT_3_G | Average HKL Measurement Multiplicity .....        |                      | 3.4   | Low         |
| PLAT955_ALERT_1_G | Reported (CIF) and Actual (FCF) Lmax Differ by .  |                      | 1     | Units       |
| PLAT978_ALERT_2_G | Number C-C Bonds with Positive Residual Density.  |                      | 4     | Info        |

---

0 **ALERT level A** = Most likely a serious problem - resolve or explain  
1 **ALERT level B** = A potentially serious problem, consider carefully

22 **ALERT level C** = Check. Ensure it is not caused by an omission or oversight  
31 **ALERT level G** = General information/check it is not something unexpected

2 ALERT type 1 CIF construction/syntax error, inconsistent or missing data  
25 ALERT type 2 Indicator that the structure model may be wrong or deficient  
10 ALERT type 3 Indicator that the structure quality may be low  
16 ALERT type 4 Improvement, methodology, query or suggestion  
1 ALERT type 5 Informative message, check

---

---

It is advisable to attempt to resolve as many as possible of the alerts in all categories. Often the minor alerts point to easily fixed oversights, errors and omissions in your CIF or refinement strategy, so attention to these fine details can be worthwhile. In order to resolve some of the more serious problems it may be necessary to carry out additional measurements or structure refinements. However, the purpose of your study may justify the reported deviations and the more serious of these should normally be commented upon in the discussion or experimental section of a paper or in the "special\_details" fields of the CIF. checkCIF was carefully designed to identify outliers and unusual parameters, but every test has its limitations and alerts that are not important in a particular case may appear. Conversely, the absence of alerts does not guarantee there are no aspects of the results needing attention. It is up to the individual to critically assess their own results and, if necessary, seek expert advice.

### **Publication of your CIF in IUCr journals**

A basic structural check has been run on your CIF. These basic checks will be run on all CIFs submitted for publication in IUCr journals (*Acta Crystallographica*, *Journal of Applied Crystallography*, *Journal of Synchrotron Radiation*); however, if you intend to submit to *Acta Crystallographica Section C* or *E* or *IUCrData*, you should make sure that full publication checks are run on the final version of your CIF prior to submission.

### **Publication of your CIF in other journals**

Please refer to the *Notes for Authors* of the relevant journal for any special instructions relating to CIF submission.

---

**PLATON version of 18/05/2022; check.def file version of 17/05/2022**

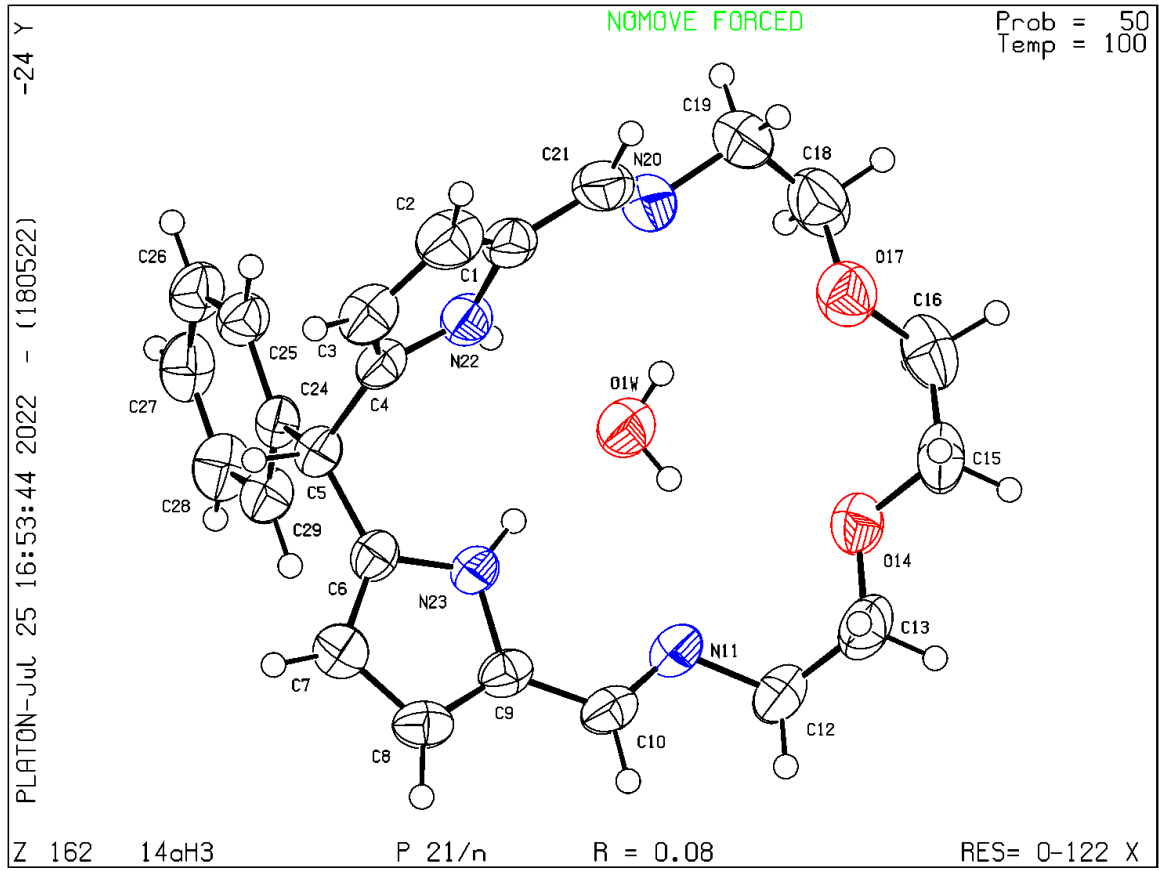

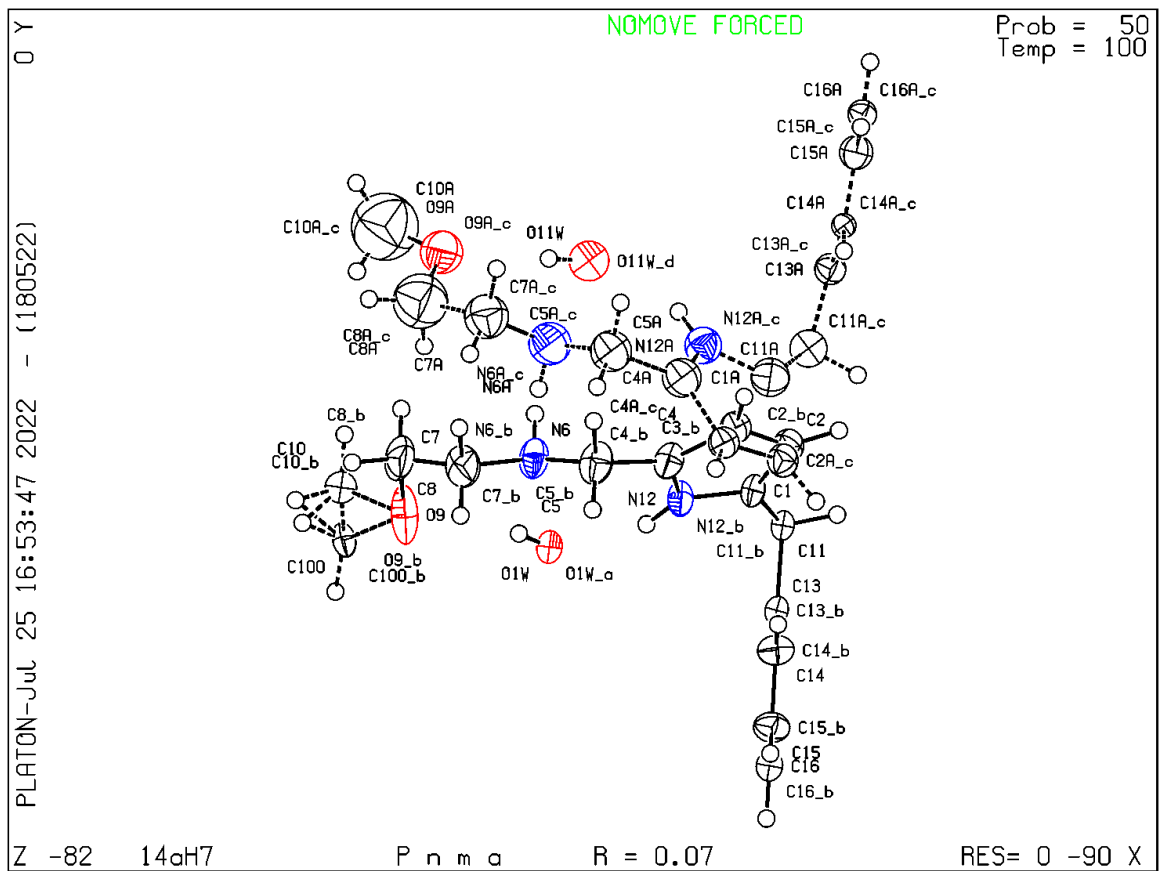

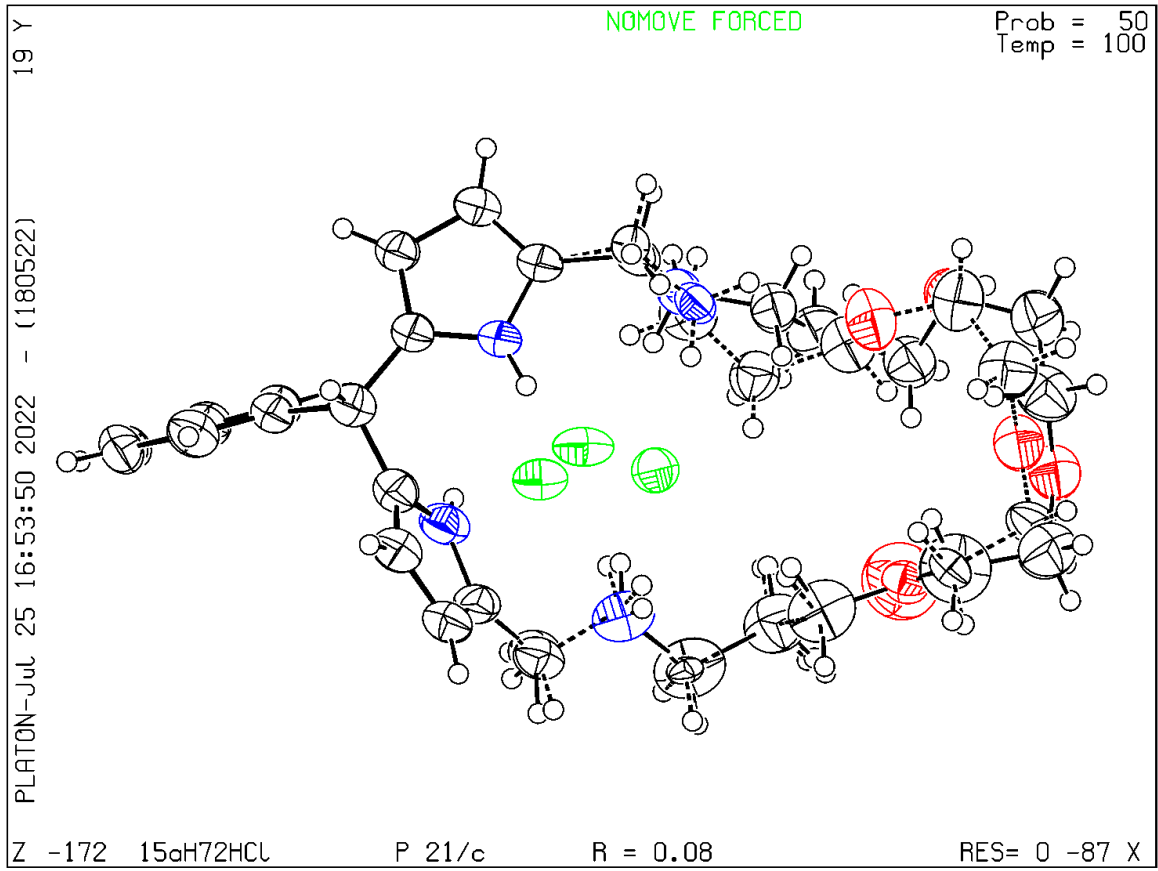



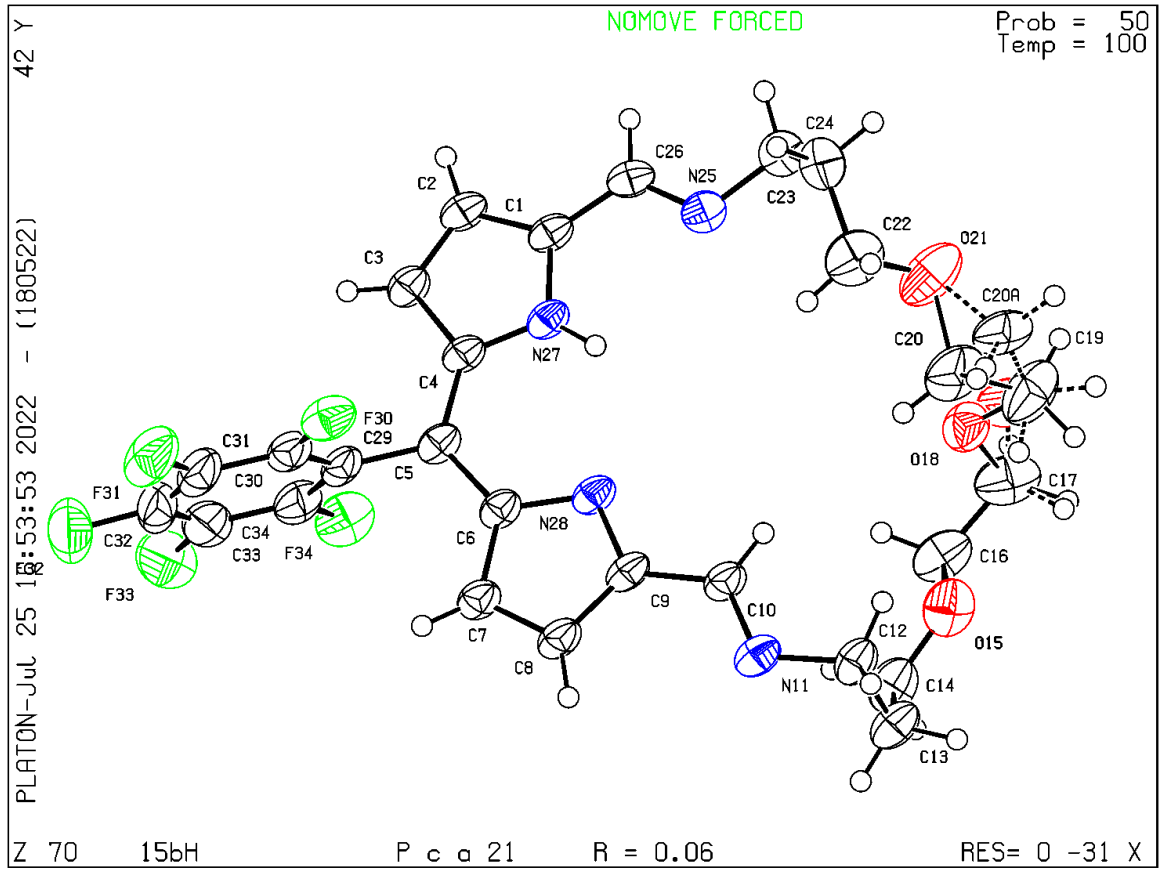

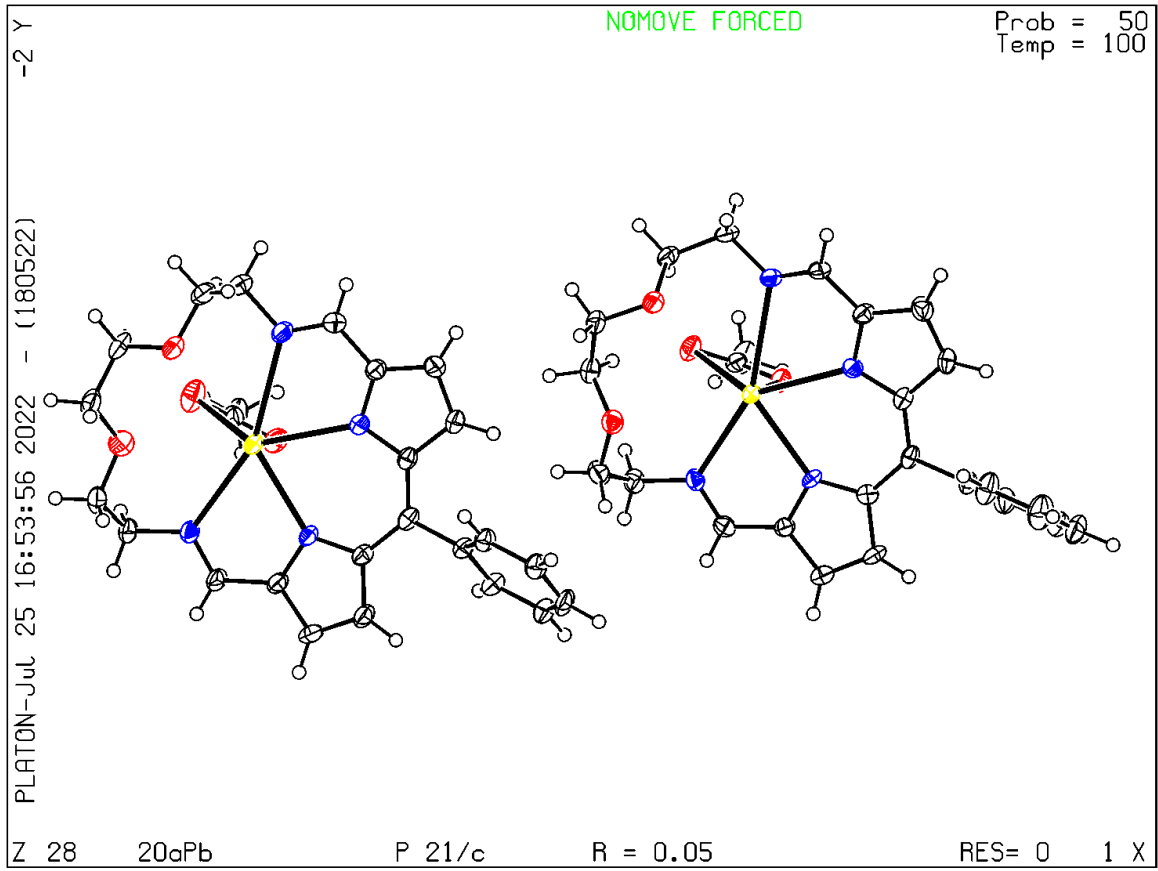

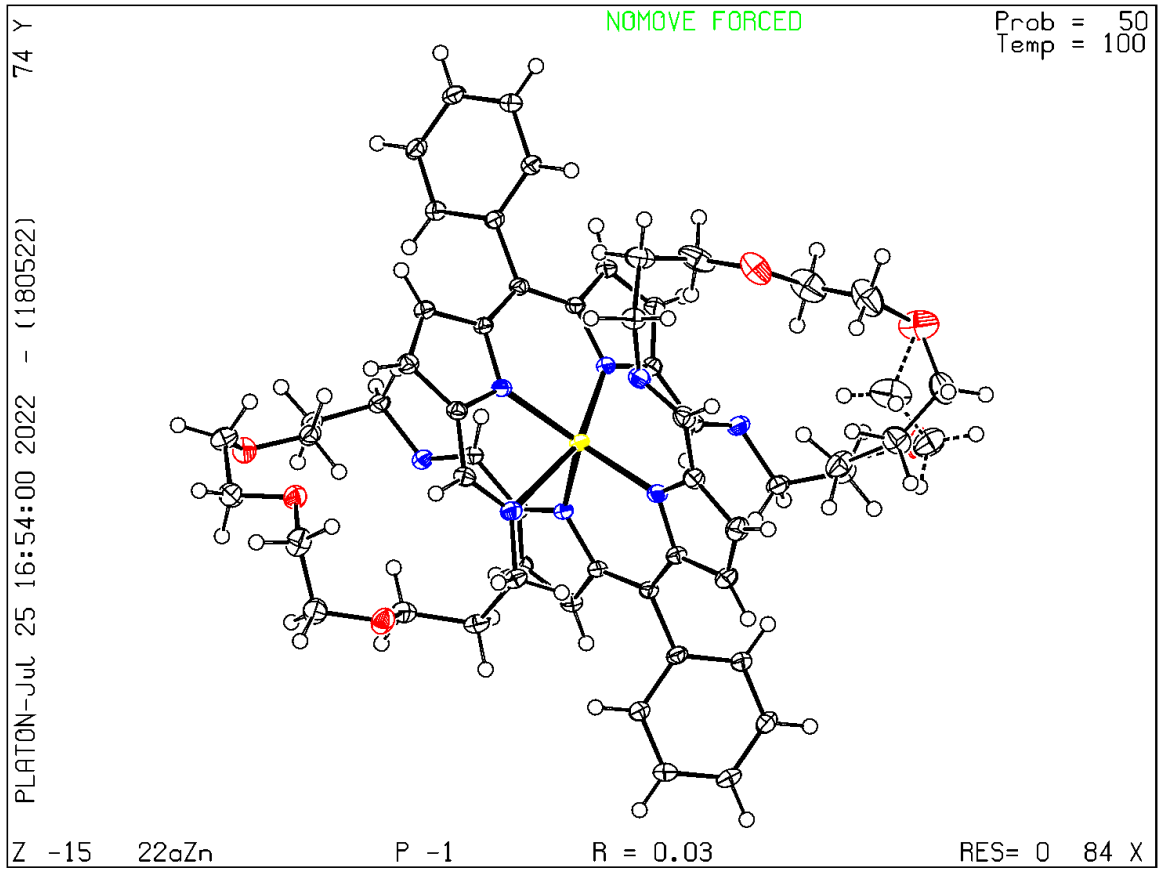

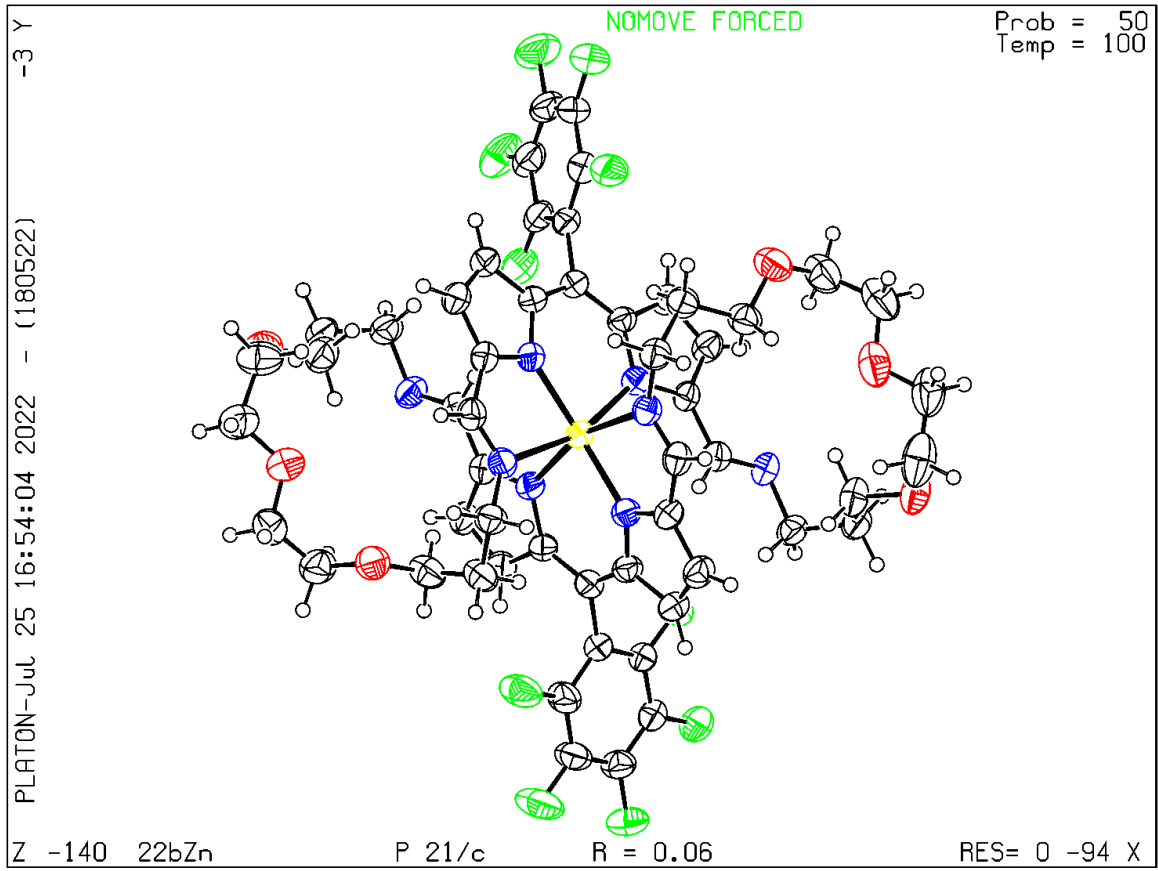

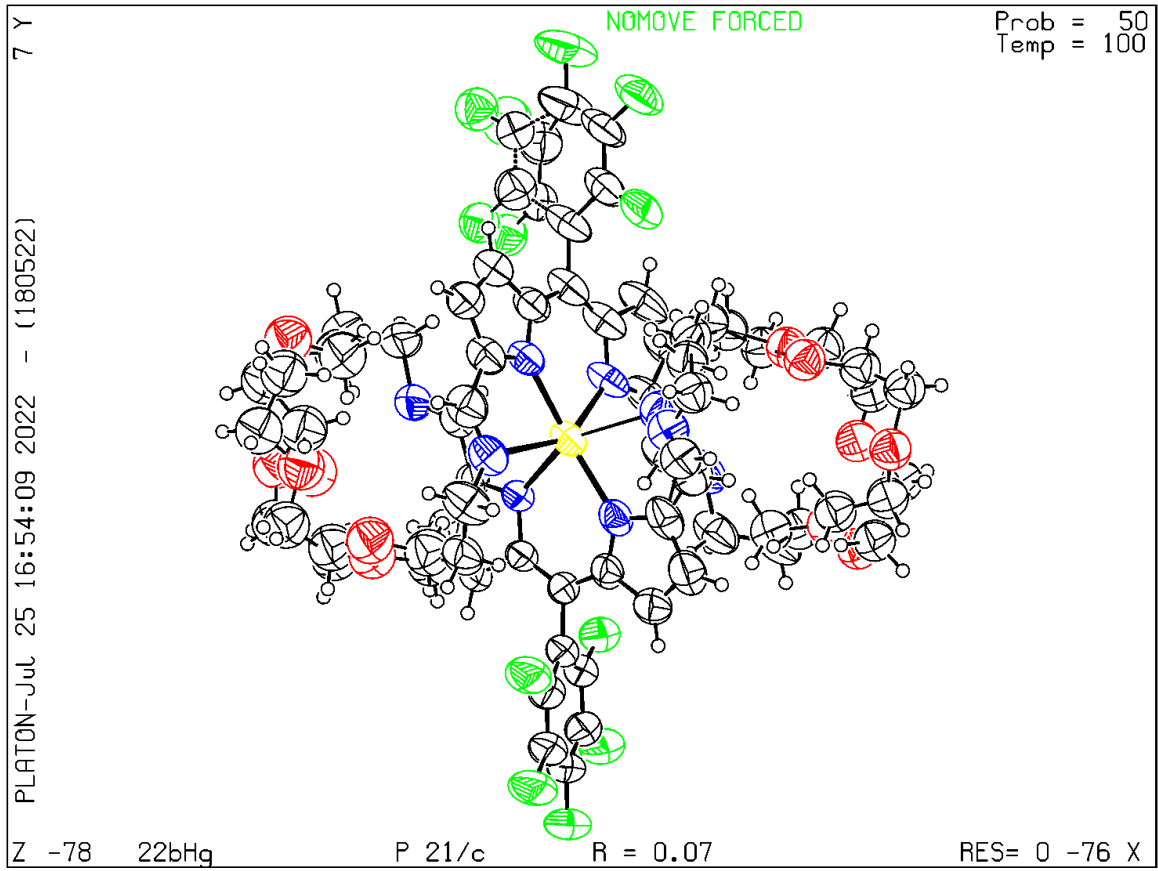

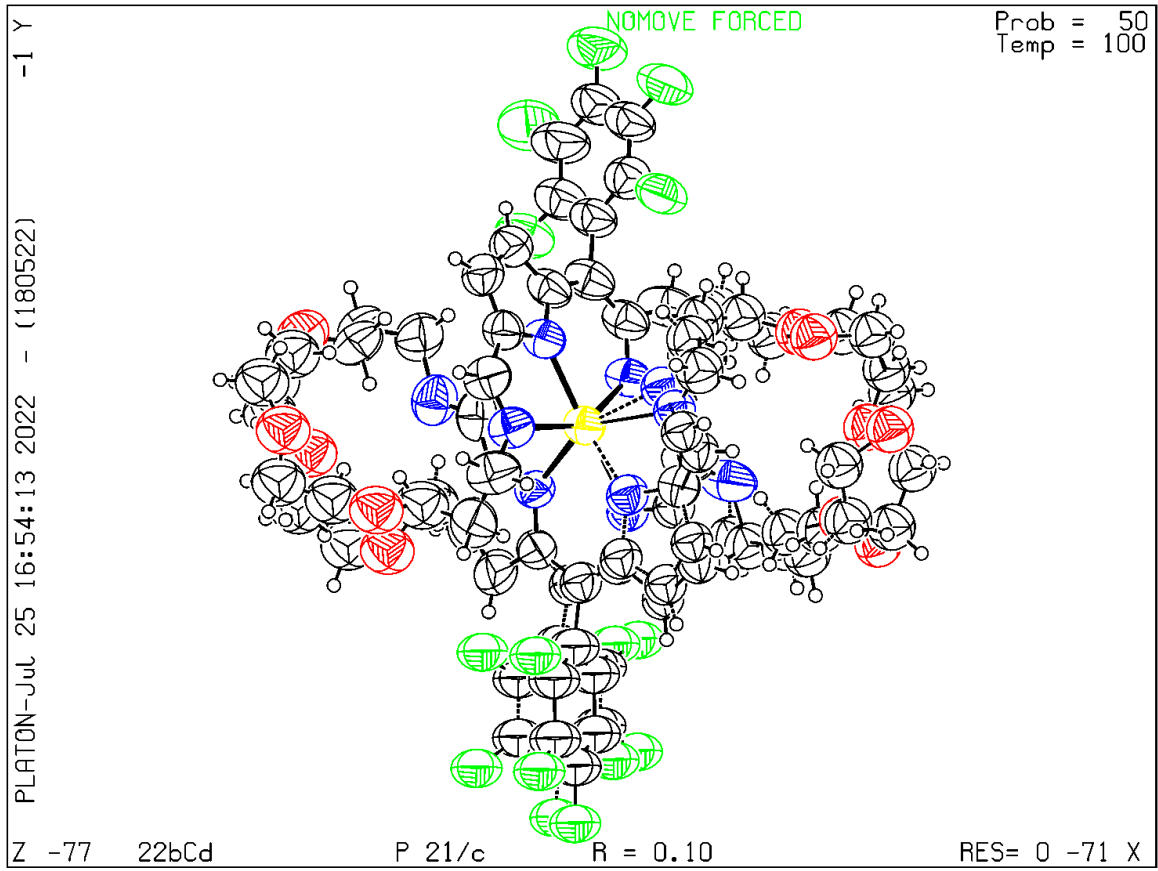

Supplement: ANIE-61-0-s001.pdf [file ANIE-61-0-s001.pdf]
